# Supplementary material for: A potent and selective reaction hijacking inhibitor of Plasmodium falciparum tyrosine tRNA synthetase exhibits single dose oral efficacy in vivo
Source: PubMed Central journal article supplement (PMC11671014; doi:10.1371/journal.ppat.1012429), 2024-12-09
Supplement: ppat.1012429.s010.pdf [file ppat.1012429.s010.pdf]

**S1 Table. The median lethal dose (LD<sub>50</sub>) values of different asexual blood stages after exposure of ML901.**

n = Number of biological repeats. Data values represent mean ± SEM or range.

| <b>Drug pulse time (h)</b>                         | <b>LD<sub>50</sub> (nM)</b> |                   |
|----------------------------------------------------|-----------------------------|-------------------|
|                                                    | <b>Troph</b>                | <b>Schizont</b>   |
| <b>3</b>                                           | 1700 ± 460 (n = 3)          | 88 ± 1 (n = 2)    |
| <b>6</b>                                           | 680 ± 48 (n = 3)            | 36 ± 6 (n = 2)    |
| <b>9</b>                                           | 290 ± 150 (n = 3)           | 21 ± 12 (n = 2)   |
| <b>24</b>                                          | 4.0 ± 0.0 (n = 3)           | N/D               |
| <b>48 (trophozoite), 30 (schizont), continuous</b> | 3.9 ± 0.8 (n = 3)           | 8.5 ± 0.7 (n = 2) |
