# Supplementary material for: A potent and selective reaction hijacking inhibitor of Plasmodium falciparum tyrosine tRNA synthetase exhibits single dose oral efficacy in vivo
Source: PubMed Central journal article supplement (PMC11671014; doi:10.1371/journal.ppat.1012429), 2024-12-09
Supplement: ppat.1012429.s011.pdf [file ppat.1012429.s011.pdf]

**S2 Table. *P. vivax* and *P. falciparum* ex vivo drug susceptibility.**

Median EC<sub>50</sub> (nM) values, the range of values, in brackets, and the numbers of isolates (n) are reported.

| Compound           | Brazilian field isolates                                        |                        |
|--------------------|-----------------------------------------------------------------|------------------------|
|                    | <i>P. falciparum</i>                                            | <i>P. vivax</i>        |
|                    | <b>Median EC<sub>50</sub> (nM) (Range) [Number of isolates]</b> |                        |
| <b>ML471</b>       | 4.2 (2.5-4.9) (n = 7)                                           | 8.0 (1.2-62) (n = 10)  |
| <b>Artesunate</b>  | 2.2 (0.8-3.1) (n = 7)                                           | 1.7 (0.8-3.5) (n = 10) |
| <b>Chloroquine</b> | 286 (172-520) (n = 7)                                           | 143 (104-560) (n = 10) |
