# Supplementary material for: A potent and selective reaction hijacking inhibitor of Plasmodium falciparum tyrosine tRNA synthetase exhibits single dose oral efficacy in vivo
Source: PubMed Central journal article supplement (PMC11671014; doi:10.1371/journal.ppat.1012429), 2024-12-09
Supplement: ppat.1012429.s012.pdf [file ppat.1012429.s012.pdf]

**S3 Table. Activity against immature (>90% stage II/III) and mature (>95% stage V) stage gametocytes (*Pf3D7-pfs16-CBG99*) for ML901, ML471 and antimalarial controls.**

MB = Methylene blue. n = Number of biological repeats. Data values represent mean  $\pm$  SEM.

| <b>Compound</b>       | <i>Early stage gametocytes</i> IC <sub>50</sub><br>(nM) | <i>Mature stage gametocytes</i> IC <sub>50</sub><br>(nM) |
|-----------------------|---------------------------------------------------------|----------------------------------------------------------|
| <b>ML901</b>          | 310 $\pm$ 60 (n = 3)                                    | 1660 $\pm$ 140 (n = 3)                                   |
| <b>ML471</b>          | 112 $\pm$ 8 (n = 3)                                     | 392 $\pm$ 14 (n = 3)                                     |
| <b>MMV390048</b>      | 138 $\pm$ 8 (n = 3)                                     | 150 $\pm$ 20 (n = 3)                                     |
| <b>Methylene blue</b> | 62 $\pm$ 11 (n = 3)                                     | 353 $\pm$ 63 (n = 3)                                     |
