# Supplementary material for: A potent and selective reaction hijacking inhibitor of Plasmodium falciparum tyrosine tRNA synthetase exhibits single dose oral efficacy in vivo
Source: PubMed Central journal article supplement (PMC11671014; doi:10.1371/journal.ppat.1012429), 2024-12-09
Supplement: ppat.1012429.s013.pdf [file ppat.1012429.s013.pdf]

**S4 Table. Activity against liver stage *P. falciparum* schizonts and against primary hepatocytes.**Data values represent mean  $\pm$  SD. n = number of independent experiments.

| <b>Compound</b>   | <i>P. falciparum</i> liver stage schizont (NF175) IC <sub>50</sub> (nM) | Primary hepatocytes IC <sub>50</sub> (nM) | <i>P. falciparum</i> liver stage schizont (NF135) IC <sub>50</sub> (nM) | Primary hepatocytes IC <sub>50</sub> (nM) |
|-------------------|-------------------------------------------------------------------------|-------------------------------------------|-------------------------------------------------------------------------|-------------------------------------------|
| <b>ML901</b>      | 13 $\pm$ 5 (n = 3)*                                                     | >10,000 (n = 3)                           | 2.9 $\pm$ 0.9 (n = 3)                                                   | > 100 (n = 3)                             |
| <b>ML471</b>      | 2.8 $\pm$ 1.5 (n = 3)                                                   | >10,000 (n = 3)                           | 5.5 $\pm$ 2.2 (n = 3)                                                   | > 100 (n = 3)                             |
| <b>Atovaquone</b> | 7.0 $\pm$ 3.9 (n = 3)                                                   | >1,000 (n = 3)                            | N.A.                                                                    | N.A.                                      |
| <b>MMV390048</b>  | N.A.                                                                    | N.A.                                      | 23.3 $\pm$ 13.3 (n = 3)                                                 | >100 (n = 3)                              |
| * Data from [1]   |                                                                         |                                           |                                                                         |                                           |

**Reference**

1. Xie SC, Metcalfe RD, Dunn E, Morton CJ, Huang SC, Puhlovich T, et al. Reaction hijacking of tyrosine tRNA synthetase as a new whole-of-life-cycle antimalarial strategy. *Science*. 2022;376(6597):1074-9.
