# Supplementary material for: A potent and selective reaction hijacking inhibitor of Plasmodium falciparum tyrosine tRNA synthetase exhibits single dose oral efficacy in vivo
Source: PubMed Central journal article supplement (PMC11671014; doi:10.1371/journal.ppat.1012429), 2024-12-09
Supplement: ppat.1012429.s014.pdf [file ppat.1012429.s014.pdf]

**S5 Table. Activity against transmissible gametes.**

n = Number of biological repeats. Data values represent mean  $\pm$  SEM.

| <b>Compound</b>             | Dual gamete formation assay (male) IC <sub>50(48h)</sub> (nM) | Dual gamete formation assay (female) IC <sub>50(48h)</sub> (nM) |
|-----------------------------|---------------------------------------------------------------|-----------------------------------------------------------------|
| <b>ML901</b>                | 130 $\pm$ 10 (n = 9)*                                         | 4,700 $\pm$ 300 (n = 9)*                                        |
| <b>ML471</b>                | 49 $\pm$ 3 (n = 4)                                            | 260 $\pm$ 10 (n = 4)                                            |
| <b>Cabamiquine (DDD498)</b> | 2.3 $\pm$ 0.4 (n = 5)                                         | 2.2 $\pm$ 0.1 (n = 5)                                           |

\* Data from [1]. Data for the DDD498 control is very similar to a previous report [2], validating the assay.

**References**

1. Xie SC, Metcalfe RD, Dunn E, Morton CJ, Huang SC, Puhlovich T, et al. Reaction hijacking of tyrosine tRNA synthetase as a new whole-of-life-cycle antimalarial strategy. *Science*. 2022;376(6597):1074-9.
2. Baragaña B, Hallyburton I, Lee MCS, Norcross NR, Grimaldi R, Otto TD, et al. A novel multiple-stage antimalarial agent that inhibits protein synthesis. *Nature*. 2015;522(7556):315-20.
