# Supplementary material for: A potent and selective reaction hijacking inhibitor of Plasmodium falciparum tyrosine tRNA synthetase exhibits single dose oral efficacy in vivo
Source: PubMed Central journal article supplement (PMC11671014; doi:10.1371/journal.ppat.1012429), 2024-12-09
Supplement: ppat.1012429.s015.pdf [file ppat.1012429.s015.pdf]

**S6 Table. Parasite Reduction Ratio.**

| <b>Compound</b>      | <b>Dose</b>           | <b>Lag phase (h)</b> | <b>Slope</b> | <b>R</b> | <b>Log PRR</b> | <b>PCT99.9% (h)</b> |
|----------------------|-----------------------|----------------------|--------------|----------|----------------|---------------------|
| <b>ML471</b>         | 10 x IC <sub>50</sub> | 0                    | -0.09        | 0.96     | 4.1            | 32                  |
| <b>Controls</b>      |                       |                      |              |          |                |                     |
| <b>Pyrimethamine</b> | 10 x IC <sub>50</sub> | 24                   | -0.078       | 0.98     | 3.7            | 56                  |
| <b>Chloroquine*</b>  | 10 x IC <sub>50</sub> | 0                    | -0.094       | 0.99     | 4.5            | 33.8                |
| <b>Atovaquone*</b>   | 10 x IC <sub>50</sub> | 48                   | -0.060       | 0.99     | 2.9            | 90                  |
| <b>Artemisinin*</b>  | 10 x IC <sub>50</sub> | 0                    | nd           | nd       | >4.8           | <24                 |
| *Data from [1].      |                       |                      |              |          |                |                     |

**Reference**

1. Sanz LM, Crespo B, De-Cozar C, Ding XC, Llergo JL, Burrows JN, et al. *P. falciparum* in vitro killing rates allow to discriminate between different antimalarial mode-of-action. PloS one. 2012;7(2):e30949.
