# Supplementary material for: A potent and selective reaction hijacking inhibitor of Plasmodium falciparum tyrosine tRNA synthetase exhibits single dose oral efficacy in vivo
Source: PubMed Central journal article supplement (PMC11671014; doi:10.1371/journal.ppat.1012429), 2024-12-09
Supplement: ppat.1012429.s016.pdf [file ppat.1012429.s016.pdf]

**S7 Table. Pharmacological and ADME characterization of ML471.**

For PK studies, rats (n = 2) were dosed with ML471 at 1 mg/kg i.v. or 10, 20 or 25 mg/kg p.o. and plasma and blood samples were collected for analysis. For blood to plasma ratio, rats (n = 2) were dosed with ML471 at 1 mg/kg and plasma and blood samples were collected for analysis.

| <b>PK analysis</b>           |              |               |                     |                        |                                                                     |                         |                 |                       |                      |           |
|------------------------------|--------------|---------------|---------------------|------------------------|---------------------------------------------------------------------|-------------------------|-----------------|-----------------------|----------------------|-----------|
| <b>Route</b>                 | <b>Dose</b>  | <b>Matrix</b> | <b>AUC</b><br>(INF) | <b>T<sub>max</sub></b> | <b>C<sub>max</sub></b>                                              | <b>T<sub>1/2z</sub></b> | <b>CL</b>       | <b>V<sub>ss</sub></b> | <b>V<sub>z</sub></b> | <b>%F</b> |
|                              | <b>mg/kg</b> |               | <b>(h*mM)</b>       | <b>(h)</b>             | <b>(nM)</b>                                                         | <b>(h)</b>              | <b>(L/h/kg)</b> | <b>(L/kg)</b>         | <b>(L/kg)</b>        |           |
| IV                           | 1            | Blood         | 21.00               | 0.17                   | 1180                                                                | 36.6                    | 0.138           | 6.25                  | 6.54                 |           |
| IV                           | 1            | Plasma        | 0.70                | 0.08                   | 1540                                                                | 2.22                    | 3.84            | 2.79                  | 12.3                 |           |
| PO                           | 1            | Blood         | 1.95                | 16.0                   | 39.3                                                                | 23.2                    |                 |                       |                      | 9.29      |
| PO                           | 1            | Plasma        | 0.194               | 0.5                    | 19.1                                                                | 8.78                    |                 |                       |                      | 27.7      |
| PO                           | 10           | Blood         | 13.15               | 6.0                    | 261                                                                 | 29.5                    |                 |                       |                      | 9.56      |
| PO                           | 10           | Plasma        | 1.74                | 0.38                   | 196                                                                 | 9.15                    |                 |                       |                      | 25.2      |
| PO                           | 25           | Blood         | 29.88               | 8.0                    | 669                                                                 | 30.5                    |                 |                       |                      | 8.72      |
| PO                           | 25           | Plasma        | 2.84                | 0.75                   | 393                                                                 | 3.57                    |                 |                       |                      | 16.4      |
| <b>Blood to plasma ratio</b> |              |               |                     |                        |                                                                     |                         |                 |                       |                      |           |
| Time (h)                     | 0.083        | 0.25          | 0.5                 | 1                      | 2                                                                   | 4                       | 8               |                       |                      |           |
| Mean blood to plasma ratio   | 0.8          | 1.5           | 2.1                 | 5.5                    | 17.8                                                                | 48.9                    | 113.9           |                       |                      |           |
| <b>ADME data</b>             |              |               |                     |                        |                                                                     |                         |                 |                       |                      |           |
| Compound                     | AlogP/ TSPA  |               | Solubility (μM)     |                        | Caco2<br>P <sub>app</sub> (x10 <sup>-6</sup> cm/s) (A to B; B to A) |                         |                 |                       |                      |           |
| ML471                        | -1.18/ 189   |               | >100                |                        | 7.6, 0.17, 1.3.                                                     |                         |                 |                       |                      |           |
