# Supplementary material for: A potent and selective reaction hijacking inhibitor of Plasmodium falciparum tyrosine tRNA synthetase exhibits single dose oral efficacy in vivo
Source: PubMed Central journal article supplement (PMC11671014; doi:10.1371/journal.ppat.1012429), 2024-12-09
Supplement: ppat.1012429.s017.pdf [file ppat.1012429.s017.pdf]

**S8 Table. Pharmacological parameters for ML471 in the SCID mouse model.**

Mice were dosed orally with four daily doses of 50 mg/kg. Samples were collected from day 3, at 1, 2, 4, 6 and 24 h after the first administration. In a separate experiment, mice were dosed orally with one dose of 100 or 200 mg/kg on day 3 after infection. Samples were collected from day 3, at 1, 2, 4, 6, 24, 48, 72, 96 and 120 h after the first administration.

| <b>SCID mouse study 4 days x 50 mg/kg p.o.</b>    |             |                            |                                    |                                                    |                                     |                                               |
|---------------------------------------------------|-------------|----------------------------|------------------------------------|----------------------------------------------------|-------------------------------------|-----------------------------------------------|
| <b>Mouse</b>                                      | <b>Dose</b> | <b>T<sub>max</sub> [h]</b> | <b>C<sub>max</sub><br/>[ng/mL]</b> | <b>C<sub>max</sub> /dose<br/>[(ng/mL)/(mg/kg)]</b> | <b>AUC0-24h<br/>[h*ng/mL]</b>       | <b>AUC0-24h/dose<br/>[(h*ng/mL)/(mg/kg)]</b>  |
| <b>M1</b>                                         | 50          | 6                          | 888                                | 17.8                                               | 19,586                              | 392                                           |
| <b>M2</b>                                         | 50          | 24                         | 1,040                              | 20.8                                               | 22,572                              | 451                                           |
| <b>N</b>                                          |             | 2                          | 2                                  | 2                                                  | 2                                   | 2                                             |
| <b>Mean</b>                                       |             | 15                         | 964                                | 19.3                                               | 21,100                              | 422                                           |
| <b>SD</b>                                         |             | 12.7                       | 107                                | 2.2                                                | 2,100                               | 42                                            |
| <b>SCID mouse study 1 x 100 or 200 mg/kg p.o.</b> |             |                            |                                    |                                                    |                                     |                                               |
| <b>Mouse</b>                                      | <b>Dose</b> | <b>T<sub>max</sub> [h]</b> | <b>C<sub>max</sub><br/>[ng/mL]</b> | <b>C<sub>max</sub> /dose<br/>[(ng/mL)/(mg/kg)]</b> | <b>AUC0-<br/>120h<br/>[h*ng/mL]</b> | <b>AUC0-120h/dose<br/>[(h*ng/mL)/(mg/kg)]</b> |
| <b>M1</b>                                         | 100         | 4                          | 3,100                              | 31                                                 | 239,000                             | 2,390                                         |
| <b>M2</b>                                         | 100         | 6                          | 3,600                              | 36                                                 | 260,000                             | 2,600                                         |
| <b>N</b>                                          |             | 2                          | 2                                  | 2                                                  | 2                                   | 2                                             |
| <b>Mean</b>                                       |             | 5                          | 3,350                              | 33.5                                               | 250,000                             | 2,500                                         |
| <b>SD</b>                                         |             | 1.4                        | 354                                | 3.54                                               | 14,500                              | 145                                           |
| <b>M3</b>                                         | 200         | 4                          | 3,340                              | 16.7                                               | 171,000                             | 855                                           |
| <b>M4</b>                                         | 200         | 4                          | 4,180                              | 20.9                                               | 259,000                             | 1,290                                         |
| <b>N</b>                                          |             | 2                          | 2                                  | 2                                                  | 2                                   | 2                                             |
| <b>Mean</b>                                       |             | 4                          | 3,760                              | 18.8                                               | 215,000                             | 1,070                                         |
| <b>SD</b>                                         |             | 0                          | 594                                | 2.97                                               | 62,000                              | 310                                           |
