# Supplementary material for: A potent and selective reaction hijacking inhibitor of Plasmodium falciparum tyrosine tRNA synthetase exhibits single dose oral efficacy in vivo
Source: PubMed Central journal article supplement (PMC11671014; doi:10.1371/journal.ppat.1012429), 2024-12-09
Supplement: ppat.1012429.s018.pdf [file ppat.1012429.s018.pdf]

**S9 Table. Summary of resistance selection.**

For ML901, Dd2-B2 parasites were subjected to pressure at 3 x IC<sub>50</sub>. Mean IC<sub>50</sub> = 2.6 ± 0.05 nM. For ML471, Dd2-B2 parasites were subjected to a single-step selection at 10 x IC<sub>50</sub>. Mean IC<sub>50</sub> and IC<sub>90</sub> values were 1.45 and 1.99 nM. DSM265, a *P. falciparum* dihydroorotate dehydrogenase inhibitor, was run as a control under the same pressure conditions. The Minimum Inoculum for Resistance (MIR) value was determined as 2.1 x 10<sup>5</sup>. For comparison, compounds exhibiting favourable MIR values include MMV1091186, a *P. falciparum* isoleucyl tRNA synthetase inhibitor, with an MIR value of >10<sup>8</sup> [1], OSM-S-106, a *P. falciparum* asparagine tRNA synthetase inhibitor, with an MIR value of >2.4 x 10<sup>8</sup> [2] and MP1-12, a *P. falciparum* proteasome inhibitor, with an MIR value of >6 x 10<sup>7</sup> / < 2 x 10<sup>9</sup>) [3].

| <b>ML901</b>                          |                        |                        |
|---------------------------------------|------------------------|------------------------|
| Number of parasites in the selection  | 10 <sup>7</sup>        | 10 <sup>8</sup>        |
| Day of recrudescence                  | 12 (1/3), 14 (2/3)     | 14 (3/3)               |
| IC <sub>50</sub> fold shift (clones)  | 2-3 x IC <sub>50</sub> | 3-6 x IC <sub>50</sub> |
| Minimum Inoculum for Resistance (MIR) | ≤ 10 <sup>7</sup>      |                        |

| <b>ML471</b>                          |                        |
|---------------------------------------|------------------------|
| Number of parasites in the selection  | 2x10 <sup>5</sup>      |
| Day of recrudescence                  | 18 (29/96 wells)       |
| IC <sub>50</sub> shift                | 9-16 xIC <sub>50</sub> |
| Minimum Inoculum for Resistance (MIR) | 7.1 x10 <sup>5</sup>   |

**References**

1. Istvan ES, Guerra F, Abraham M, Huang KS, Rocamora F, Zhao H, et al. Cytoplasmic isoleucyl tRNA synthetase as an attractive multistage antimalarial drug target. *Science translational medicine*. 2023;15(686):eadc9249.
2. Xie SC, Wang Y, Morton CJ, Metcalfe RD, Dogovski C, Pasaje CFA, et al. Reaction hijacking inhibition of *Plasmodium falciparum* asparagine tRNA synthetase. *Nat Commun*. 2024;15(1):937.
3. Xie SC, Metcalfe RD, Mizutani H, Puhlovich T, Hanssen E, Morton CJ, et al. Design of proteasome inhibitors with oral efficacy in vivo against *Plasmodium falciparum* and selectivity over the human proteasome. *Proc Natl Acad Sci U S A*. 2021;118(39):e2107213118.
