# Supplementary material for: A potent and selective reaction hijacking inhibitor of Plasmodium falciparum tyrosine tRNA synthetase exhibits single dose oral efficacy in vivo
Source: PubMed Central journal article supplement (PMC11671014; doi:10.1371/journal.ppat.1012429), 2024-12-09
Supplement: ppat.1012429.s019.pdf [file ppat.1012429.s019.pdf]

**S10 Table. Copy Number Variants (CNV) in ML901-selected sample**

CNV amplification was found in sample F1 (BULK\_JOS\_1E7\_F1), F3 (BULK\_JOS\_1E8\_F3), F1-F6 (F1\_F6\_KS, a clone from the BULK 1E8 F1 selection) and FL1 (FL1\_1E8) at different factors. F1 exhibits a lower increase at ~1.8 across a wider range, whereas F3, F1-F6 and FL1 show a ~2x increase only for the second half of the segment. Strikingly, three separate genome amplification boundaries were observed, with each including the tyrosine tRNA ligase (PF3D7\_0807900).

| Gene ID              | Gene Name                                                   | Fold gain in copy number on Chromosome 8 |             |             |             |
|----------------------|-------------------------------------------------------------|------------------------------------------|-------------|-------------|-------------|
|                      |                                                             | F1                                       | F3          | F1_F6       | FL1         |
| PF3D7_0806300        | ferlin-like protein, putative                               | 1.80                                     | 1.00        | 1.00        | 1.00        |
| PF3D7_0806400        | UDP-N-acetylglucosamine transferase subunit ALG13, putative | 1.80                                     | 1.00        | 1.00        | 1.00        |
| PF3D7_0806500        | DnaJ protein, putative                                      | 1.80                                     | 1.00        | 1.00        | 1.00        |
| PF3D7_0806600        | kinesin-like protein, putative                              | 1.80                                     | 1.00        | 1.00        | 1.00        |
| PF3D7_0806700        | conserved Plasmodium membrane protein, unknown function     | 1.80                                     | 1.00        | 1.00        | 1.00        |
| PF3D7_0806800        | V-type proton ATPase subunit a, putative                    | 1.80                                     | 1.00        | 1.00        | 1.00        |
| PF3D7_0806900        | conserved protein, unknown function                         | 1.80                                     | 1.00        | 1.00        | 1.00        |
| PF3D7_0807000        | YEATS domain-containing protein, putative                   | 1.80                                     | 1.00        | 1.00        | 1.79        |
| PF3D7_0807100        | DNA helicase PSH3                                           | 1.80                                     | 1.00        | 1.00        | 1.79        |
| PF3D7_0807200        | conserved Plasmodium membrane protein, unknown function     | 1.67                                     | 2.24        | 2.54        | 2.32        |
| PF3D7_0807300        | ras-related protein Rab-18                                  | 1.67                                     | 2.24        | 2.54        | 2.32        |
| PF3D7_0807400        | coenzyme Q-binding protein COQ10 homolog, mitochondrial     | 1.67                                     | 2.24        | 2.54        | 2.32        |
| PF3D7_0807500        | proteasome subunit alpha type-6, putative                   | 1.67                                     | 2.24        | 2.54        | 2.32        |
| PF3D7_0807600        | conserved Plasmodium protein, unknown function              | 1.67                                     | 2.24        | 2.54        | 2.32        |
| PF3D7_0807700        | serine protease DegP                                        | 1.67                                     | 2.24        | 2.54        | 2.32        |
| PF3D7_0807800        | 26S proteasome regulatory subunit RPN10, putative           | 1.67                                     | 2.24        | 2.54        | 2.32        |
| <b>PF3D7_0807900</b> | <b>tyrosine tRNA ligase</b>                                 | <b>1.67</b>                              | <b>2.24</b> | <b>2.54</b> | <b>2.32</b> |
| PF3D7_0808000        | conserved Plasmodium protein, unknown function              | 1.00                                     | 2.24        | 2.54        | 2.32        |
| PF3D7_0808100        | AP-3 complex subunit delta, putative                        | 1.00                                     | 2.24        | 2.54        | 2.32        |
| PF3D7_0808200        | plasmepsin X                                                | 1.00                                     | 2.24        | 2.54        | 2.32        |
| PF3D7_0808300        | ubiquitin regulatory protein, putative                      | 1.00                                     | 2.24        | 2.54        | 2.32        |
| PF3D7_0808400        | coatamer subunit epsilon, putative                          | 1.00                                     | 2.24        | 2.54        | 2.32        |
