# Supplementary material for: A potent and selective reaction hijacking inhibitor of Plasmodium falciparum tyrosine tRNA synthetase exhibits single dose oral efficacy in vivo
Source: PubMed Central journal article supplement (PMC11671014; doi:10.1371/journal.ppat.1012429), 2024-12-09
Supplement: ppat.1012429.s020.pdf [file ppat.1012429.s020.pdf]

**S11 Table. Copy Number Variants (CNV) in ML471-selected sample.**

CNV amplification within a 57 kb segment on chromosome 8, by ~3.8 and 4-fold in samples C2 and E2, respectively. These samples correspond to wells seeded at  $2 \times 10^5$  parasites that recrudescenced following selection at  $10 \times IC_{50}$ . Note that both wells had different 5' amplification breakpoints and thus were independent events that shared the same region of amplification at the 3' end. Both wells shared a ~4-fold amplification of tyrosine tRNA ligase, consistent with a slightly higher  $IC_{50}$  increase compared with ML901-selected ~2-fold amplifications described above.

| Gene ID              | Gene Name                                               | Fold gain in copy number on Chromosome 8 |             |
|----------------------|---------------------------------------------------------|------------------------------------------|-------------|
|                      |                                                         | C2                                       | E2          |
| PF3D7_0807000        | YEATS domain-containing protein, putative               | 3.48                                     | 1.000       |
| PF3D7_0807100        | DNA helicase PSH3                                       | 3.48                                     | 1.000       |
| PF3D7_0807200        | conserved Plasmodium membrane protein, unknown function | 3.80                                     | 1.000       |
| PF3D7_0807300        | ras-related protein Rab-18                              | 3.80                                     | 1.00        |
| PF3D7_0807400        | coenzyme Q-binding protein COQ10 homolog, mitochondrial | 3.80                                     | 1.00        |
| PF3D7_0807500        | proteasome subunit alpha type-6, putative               | 3.80                                     | 1.00        |
| PF3D7_0807600        | conserved Plasmodium protein, unknown function          | 3.80                                     | 1.00        |
| PF3D7_0807700        | serine protease DegP                                    | 3.80                                     | 4.04        |
| PF3D7_0807800        | 26S proteasome regulatory subunit RPN10, putative       | 3.80                                     | 4.04        |
| <b>PF3D7_0807900</b> | <b>tyrosine tRNA ligase</b>                             | <b>3.80</b>                              | <b>4.04</b> |
| PF3D7_0808000        | conserved Plasmodium protein, unknown function          | 3.80                                     | 4.04        |
| PF3D7_0808100        | AP-3 complex subunit delta, putative                    | 3.80                                     | 4.04        |
| PF3D7_0808200        | plasmepsin X                                            | 3.80                                     | 4.04        |
| PF3D7_0808300        | ubiquitin regulatory protein, putative                  | 3.80                                     | 4.04        |
| PF3D7_0808400        | coatamer subunit epsilon, putative                      | 3.80                                     | 4.04        |
| PF3D7_0808500        | Plasmodium RNA of unknown function RUF6                 | 3.80                                     | 4.04        |
