# Supplementary material for: A potent and selective reaction hijacking inhibitor of Plasmodium falciparum tyrosine tRNA synthetase exhibits single dose oral efficacy in vivo
Source: PubMed Central journal article supplement (PMC11671014; doi:10.1371/journal.ppat.1012429), 2024-12-09
Supplement: ppat.1012429.s021.pdf [file ppat.1012429.s021.pdf]

**S12 Table. T<sub>m</sub> values of TyrRSs determined by differential scanning fluorimetry (DSF).**

The T<sub>m</sub> values for TyrRSs were measured in the apo form or after incubation with the nucleoside sulfamates in the presence of ATP, tyrosine and tRNA. AMS = Adenosine 5'-sulfamate. Data values represent mean ± SEM from three independent experiments.

|                     |            |            |            |                             |            |                             |
|---------------------|------------|------------|------------|-----------------------------|------------|-----------------------------|
| <i>Pf</i> TyrRS     | ML901      | ML471      | ML676      | ML681                       | ML723      | Apo ( <i>Pf</i> TyrRS only) |
| T <sub>m</sub> (°C) | 65.1 ± 0.5 | 67.9 ± 0.4 | 65.5 ± 0.6 | 66.3 ± 0.5                  | 66.1 ± 0.7 | 49.9 ± 0.6                  |
| <i>Pf</i> TyrRS     | ML107      | ML470      | ML864      | ML111                       | AMS        |                             |
| T <sub>m</sub> (°C) | 63.5 ± 0.4 | 65.5 ± 0.6 | 66.9 ± 0.5 | 65.0 ± 0.5                  | 63.5 ± 0.7 |                             |
| <i>Hs</i> TyrRS     | ML901      | ML471      | AMS        | Apo ( <i>Hs</i> TyrRS only) |            |                             |
| T <sub>m</sub> (°C) | 49.4 ± 0.1 | 49.0 ± 0.2 | 58.2 ± 0.3 | 49.0 ± 0.2                  |            |                             |
