# Supplementary material for: A potent and selective reaction hijacking inhibitor of Plasmodium falciparum tyrosine tRNA synthetase exhibits single dose oral efficacy in vivo
Source: PubMed Central journal article supplement (PMC11671014; doi:10.1371/journal.ppat.1012429), 2024-12-09
Supplement: ppat.1012429.s022.pdf [file ppat.1012429.s022.pdf]

**S13 Table. X-ray diffraction data collection and refinement statistics.**

|                                      | <i>PfYRS/Tyr-ML471</i>     |
|--------------------------------------|----------------------------|
| <b>Data collection</b>               |                            |
| Space group                          | C 2                        |
| Wavelength (Å)                       | 0.9537                     |
| Number of images                     | 3600                       |
| Oscillation range per image (°)      | 0.1                        |
| Detector                             | Eiger 16M                  |
| <i>Cell dimensions</i>               |                            |
| a, b, c (Å)                          | 138.21, 47.27, 140.512     |
| $\alpha, \beta, \gamma$ (°)          | 90, 94.63, 90              |
| Resolution (Å)                       | 46.68 - 1.80 (1.82 - 1.80) |
| R <sub>sym</sub>                     | 0.086 (0.765)              |
| R <sub>meas</sub>                    | 0.102 (0.899)              |
| R <sub>pim</sub>                     | 0.054 (0.470)              |
| CC1/2                                | 0.998 (0.838)              |
| I/ $\sigma$ (I)                      | 9.4 (1.2)                  |
| Total observations                   | 567540 (31557)             |
| Unique reflections                   | 84432 (4481)               |
| Completeness (%)                     | 99.9 (100.0)               |
| Multiplicity                         | 6.7 (7.0)                  |
| Wilson B factor (Å <sup>2</sup> )    | 32.5                       |
|                                      |                            |
| <b>Refinement</b>                    |                            |
| Resolution (Å)                       | 46.68 - 1.80 (1.82 - 1.80) |
| Reflections used in refinement       | 84394 (2835)               |
| R <sub>free</sub> reflections        | 4177 (136)                 |
| R <sub>work</sub>                    | 0.1830 (0.3172)            |
| R <sub>free</sub>                    | 0.2198 (0.3517)            |
| Protein molecules in asymmetric unit | 2                          |
| Total nonhydrogen atoms              | 6159                       |
| Protein                              | 5683                       |
| Ligand/ion                           | 96                         |
| Solvent                              | 380                        |
| Mean B factor (Å <sup>2</sup> )      | 50.31                      |

|                                           |       |
|-------------------------------------------|-------|
| Protein                                   | 50.50 |
| Ligand/ion                                | 39.63 |
| Solvent                                   | 50.14 |
| RMS deviations                            |       |
| Bond lengths (Å) (outliers > 4 $\sigma$ ) | 0.017 |
| Bond angles (°) (outliers > 4 $\sigma$ )  | 1.52  |
| Rotamer outliers (%)                      | 1.09  |
| Clashscore                                | 6.33  |
| C $\beta$ outliers                        | 0     |
| Molprobit score                           | 1.35  |
| <i>Ramachandran Plot</i>                  |       |
| Favoured (%)                              | 98.55 |
| Allowed (%)                               | 1.45  |
| Outliers (%)                              | 0     |
